# Supplementary material for: Optimizing NK-92 serial killers: gamma irradiation, CD95/Fas-ligation, and NK or LAK attack limit cytotoxic efficacy
Source: PubMed Central journal article supplement (PMC8976335; doi:10.1186/s12967-022-03350-6), 2022-04-02
Supplement: 12967_2022_3350_MOESM1_ESM.pdf [file 12967_2022_3350_MOESM1_ESM.pdf]

**Table S1. NK cell lines derived from malignancies or from blood NK cells of healthy donors**

| <b>Cell Lines</b> | <b>Origin</b>            | <b>Published</b> | <b>PMID</b> | <b>CD16</b> |
|-------------------|--------------------------|------------------|-------------|-------------|
| NK3.3*            | Peripheral blood         | 1982             | 6982944     | +           |
| YT                | Lymphoblastic lymphoma   | 1985             | 2578514     | +           |
| YT2C2 & YTC3      | Subclone of YT           | 1992             | 1313126     | +           |
| YTS               | Subclone of YT           | 2006             | 16801532    | -           |
| NK-92             | LGL - lymphoma           | 1994             | 8152260     | -           |
| NKL               | LGL - leukemia           | 1996             | 8599969     | +           |
| NK-YS             | NK - nasal lymphoma      | 1998             | 9694726     | -           |
| KHYG-1            | LGL - leukemia           | 2000             | 10803526    | -           |
| SNK-6             | NK - nasal lymphoma      | 2001             | 11157488    | -           |
| IMC-1             | LGL - leukemia           | 2004             | 14687623    | +           |
| NKG               | LGL - lymphoma           | 2011             | 21669033    | -           |
| MJ23 plus 4*      | Cord or peripheral blood | 2014             | 23787393    | +           |
| NK101             | NK/T cell lymphoma       | 2019             | 31126350    | -           |

\*NK3.3 and other indicated NK-derived cell lines were derived from healthy donor cells
