# Supplementary material for: Optimizing NK-92 serial killers: gamma irradiation, CD95/Fas-ligation, and NK or LAK attack limit cytotoxic efficacy
Source: PubMed Central journal article supplement (PMC8976335; doi:10.1186/s12967-022-03350-6), 2022-04-02
Supplement: 12967_2022_3350_MOESM2_ESM.pdf [file 12967_2022_3350_MOESM2_ESM.pdf]

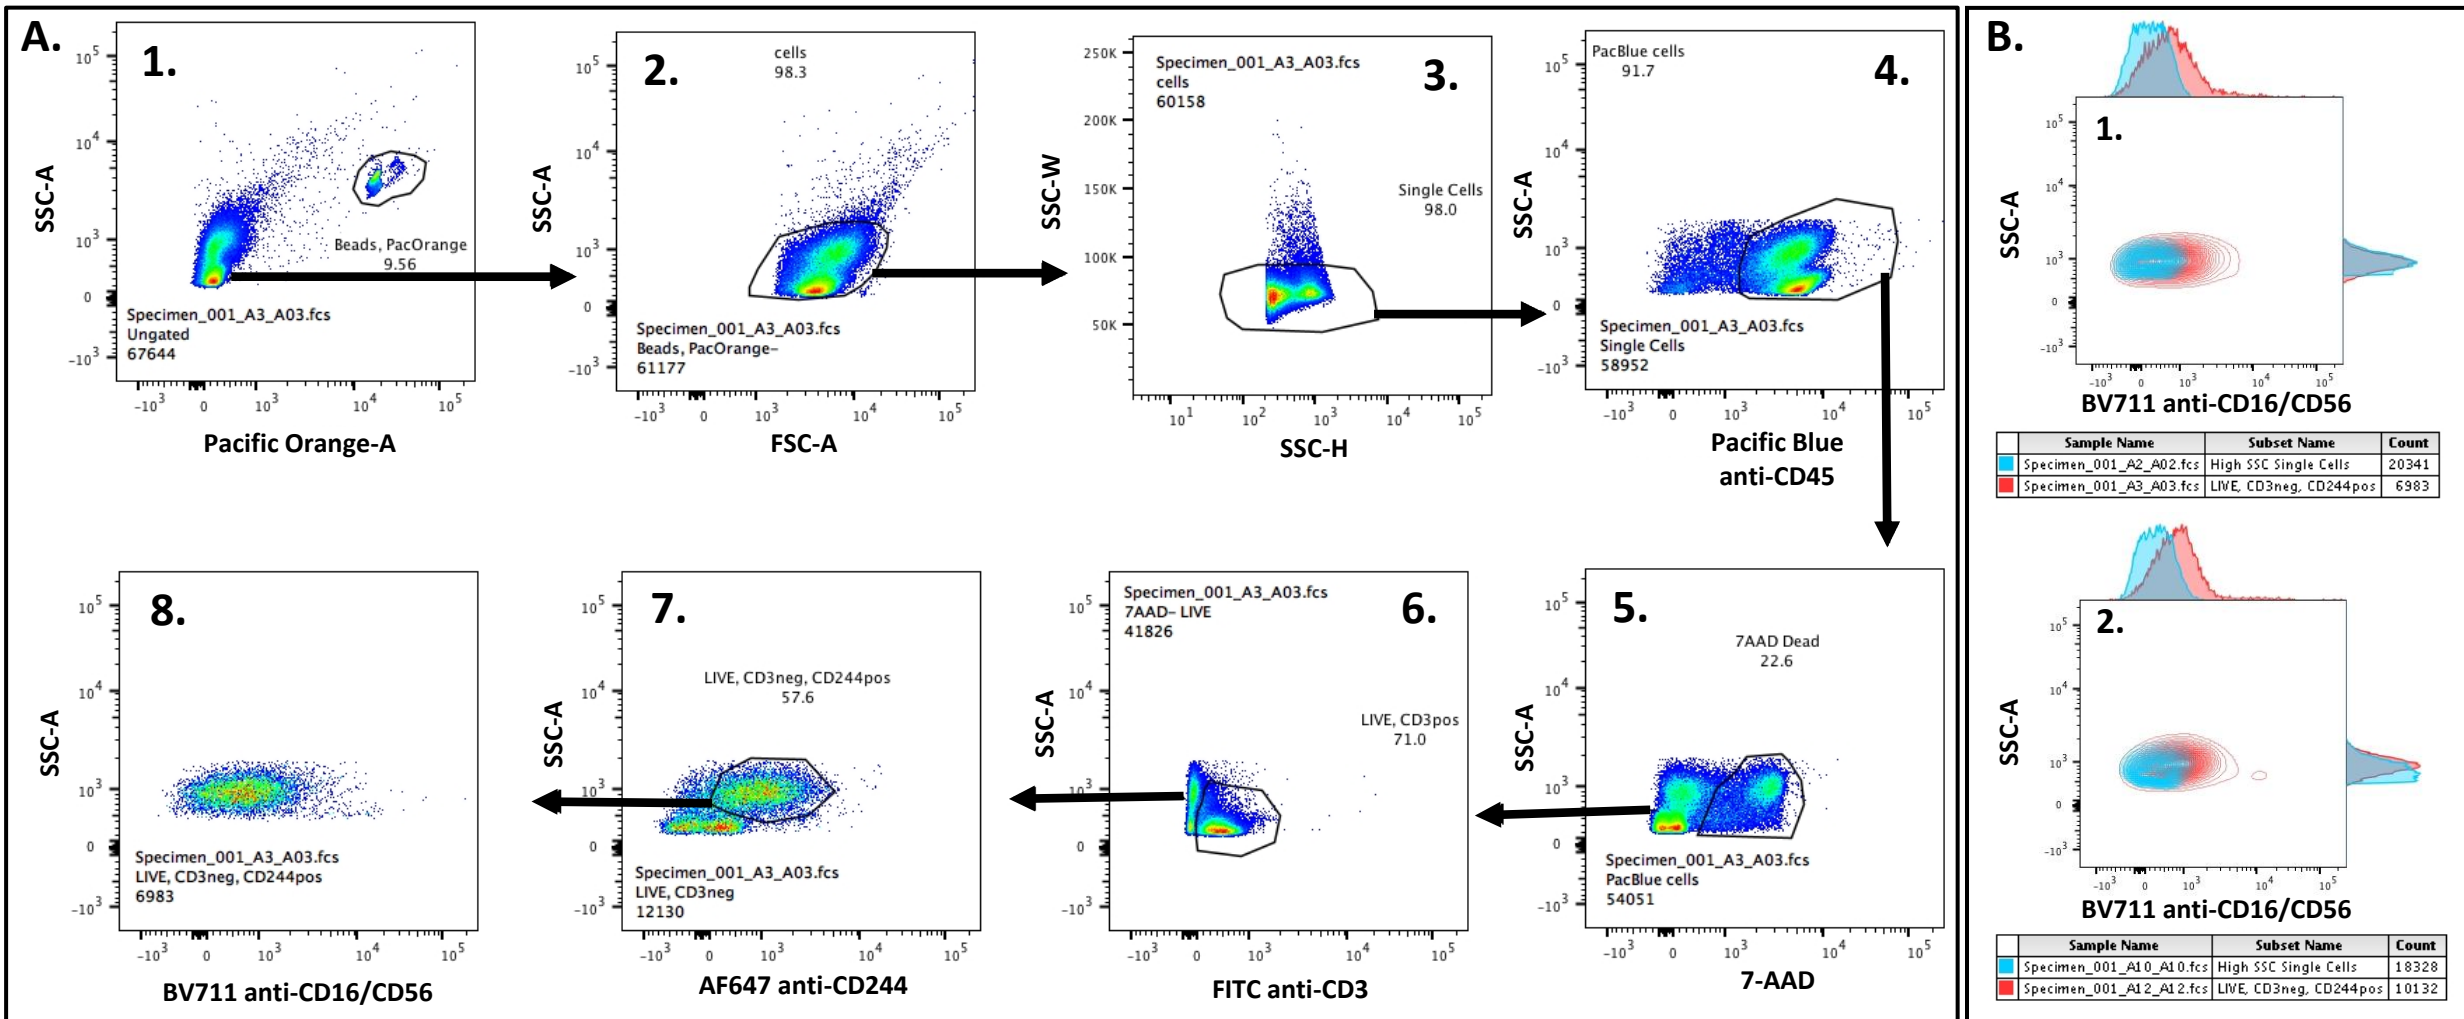

**Figure S1. Flow cytometry to determine the number of primary NK cells within peripheral blood mononuclear cells. A. Gating sequence. 1.** First, beads were gated by high Pacific Orange signal. **2.** Cells without debris were gated by forward scatter (FSC-A) v side scatter (SSC-A). **3.** Single cells (without doublets) were gated by SSC height versus SSC width. **4.** All cells were gated on by Pacific Blue anti-CD45. **5.** Live cells were gated by Boolean not gate, taking 7-AAD positive cells as dead cells. **6.** T-cells were gated out by Boolean not gate of FITC anti-CD3 positive T-cells. **7.** NK cells were gated on as AF647 anti-CD244 positive cells. CD244 is expressed by CD8+ T-cells (gated out with CD3) and all NK cells [see ref 22]. **8.** NK cell staining for BV711 anti-CD16/CD56. **B. Expression of CD16A & CD56 by resting and IL-2 activated (LAK) bNK cells.** Light blue samples are the unstained control cells respective for each group. Red samples are stained CD16A and/or CD56. **1.** Unstimulated bNK cells. **2.** Interleukin-2 activated LAK bNK cells.
