# Supplementary material for: Optimizing NK-92 serial killers: gamma irradiation, CD95/Fas-ligation, and NK or LAK attack limit cytotoxic efficacy
Source: Springer Nature journal article supplement (doi:10.1186/s12967-022-03350-6), 2022-04-02
Supplement: MOESM3 [file 20278454]

| <b>Table S2. NK-92 KFs at E:T 1:16 after 8 Hours</b> |                |            |            |          |              |
|------------------------------------------------------|----------------|------------|------------|----------|--------------|
| <b>Target</b>                                        | <b>Average</b> | <b>Min</b> | <b>Max</b> | <b>N</b> | <b>Stdev</b> |
| Raji                                                 | 6.7            | 3.0        | 9.5        | 11       | 2.2          |
| Daudi                                                | 6.8            | 6.5        | 8.5        | 3        | 1.6          |
| K562                                                 | 2.0            | 0.3        | 3.5        | 4        | 1.4          |

Data are based on calculations from both observed results and extrapolations based on the linear equation from LU<sub>50</sub> graphs. For Rajis & Daudis, 1 experiment is extrapolated data. For K562s, 2 experiments are extrapolated data.
