# Supplementary material for: Optimizing NK-92 serial killers: gamma irradiation, CD95/Fas-ligation, and NK or LAK attack limit cytotoxic efficacy
Source: Springer Nature journal article supplement (doi:10.1186/s12967-022-03350-6), 2022-04-02
Supplement: MOESM4 [file 20278454]

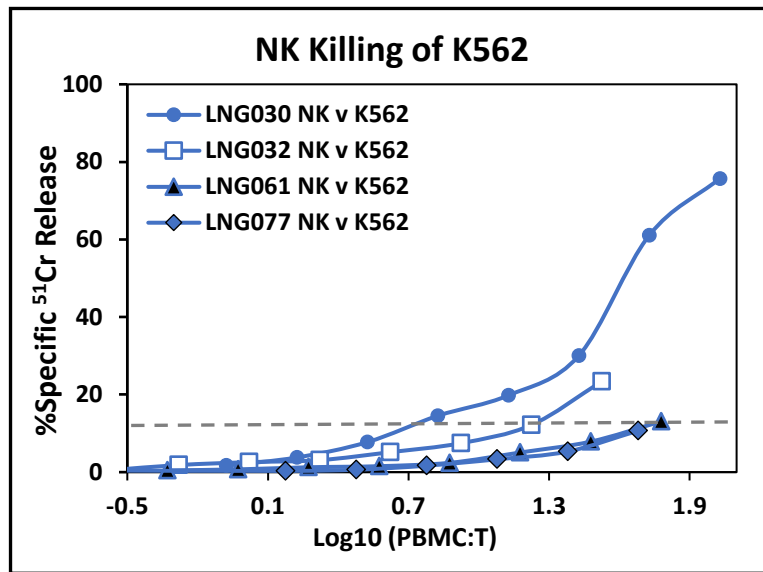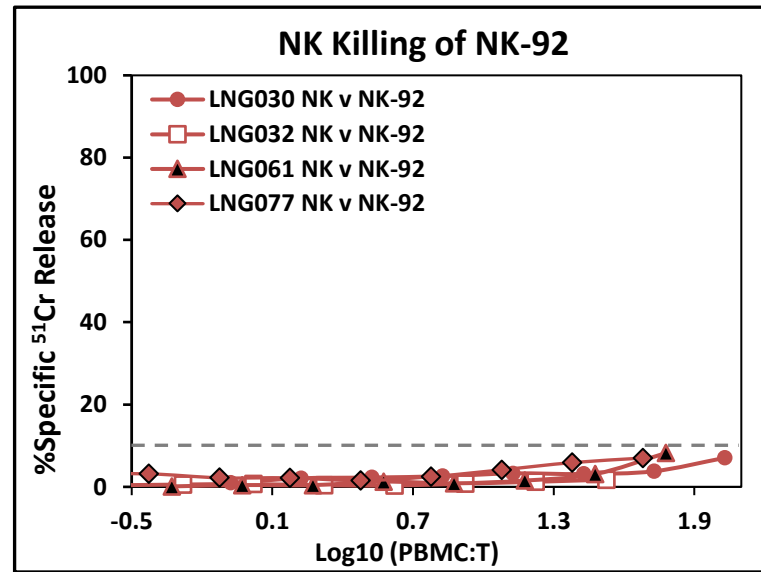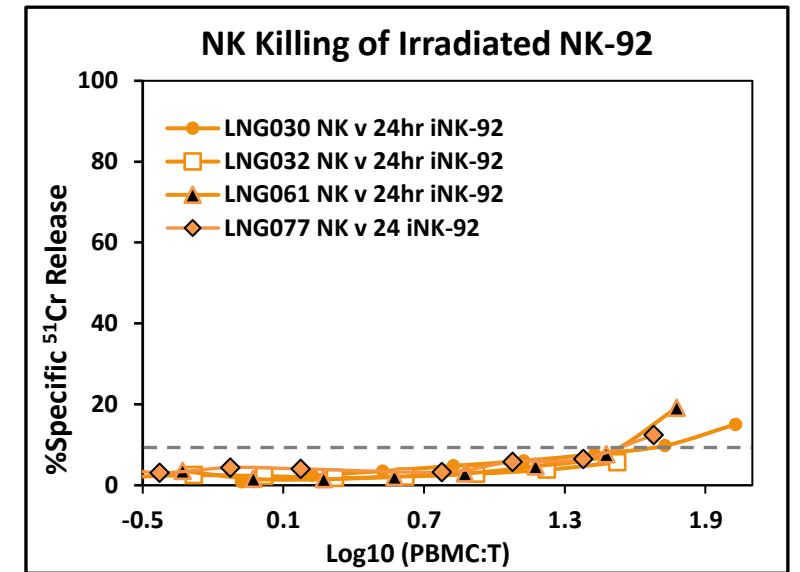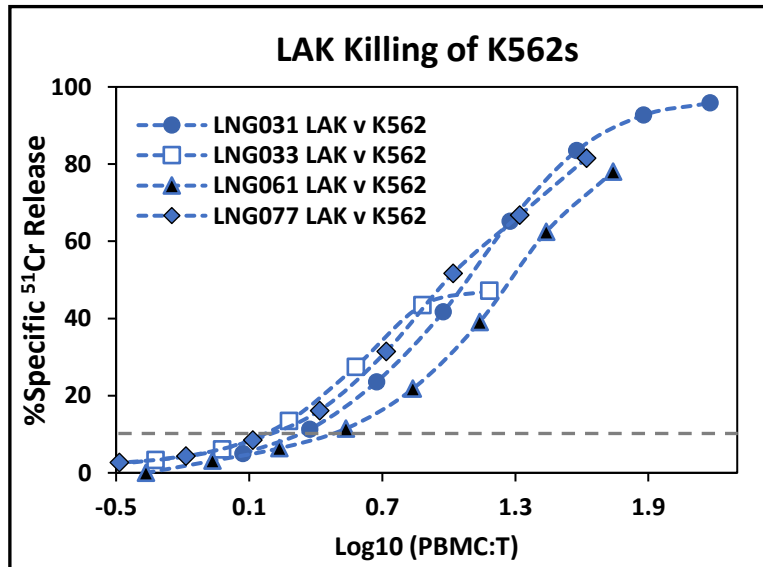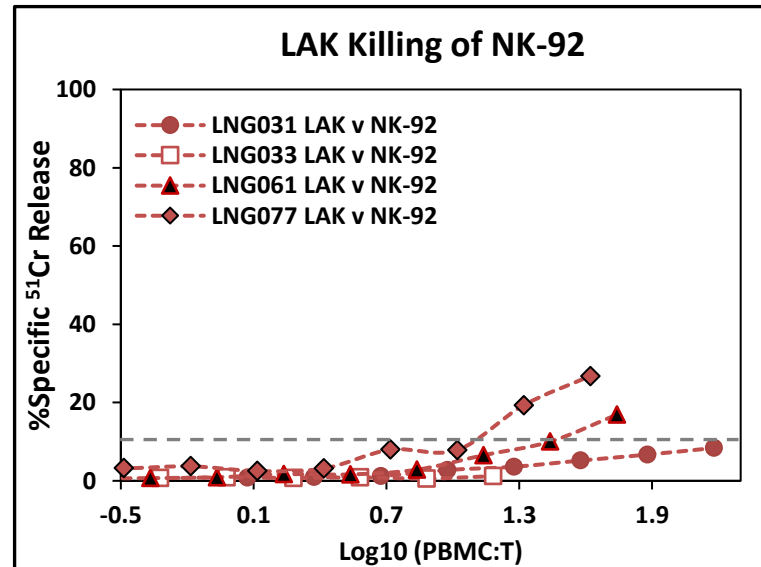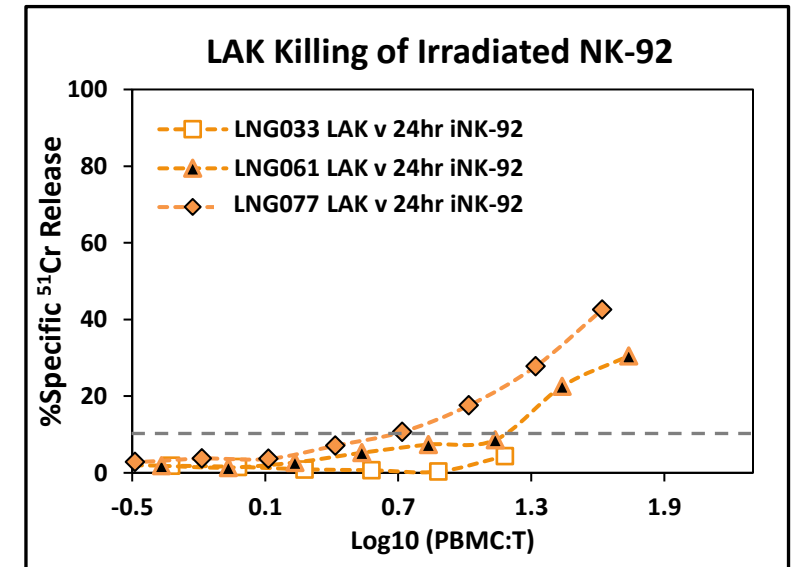

**Figure S2. Killing of NK-92 cells by either resting or activated primary blood NK cells.** The susceptibility of NK-92 cells to attack by primary peripheral blood NK cells from healthy donors was investigated using NK-92 cells that were either non-irradiated or were irradiated with 10 Gy and then cultured for one day. The primary NK cells were either resting or activated by three days culture with 1000 u/ml IL-2. Cytotoxicity was measured using 4-hour <sup>51</sup>Cr-release assays; the horizontal gray dashed line reflects the 10% threshold for positive killing. The results illustrated represent assays of multiple donors across multiple experiments. LNG identifier corresponds to experiment number.
